# Supplementary material for: Computational identification of human ubiquitination sites using convolutional and recurrent neural networks
Source: Royal Society of Chemistry journal article supplement (doi:10.1039/d0mo00183j), 2021-08-27
Supplement: d0mo00183j1.xlsx [file d0mo00183j1.xlsx]

## Sheet: DATA31
Binary encoding
Residue
A	1	0	0	0	0	0	0	0	0	0	0	0	0	0	0	0	0	0	0	0	0
R	0	1	0	0	0	0	0	0	0	0	0	0	0	0	0	0	0	0	0	0	0
N	0	0	1	0	0	0	0	0	0	0	0	0	0	0	0	0	0	0	0	0	0
D	0	0	0	1	0	0	0	0	0	0	0	0	0	0	0	0	0	0	0	0	0
C	0	0	0	0	1	0	0	0	0	0	0	0	0	0	0	0	0	0	0	0	0
Q	0	0	0	0	0	1	0	0	0	0	0	0	0	0	0	0	0	0	0	0	0
E	0	0	0	0	0	0	1	0	0	0	0	0	0	0	0	0	0	0	0	0	0
G	0	0	0	0	0	0	0	1	0	0	0	0	0	0	0	0	0	0	0	0	0
H	0	0	0	0	0	0	0	0	1	0	0	0	0	0	0	0	0	0	0	0	0
I	0	0	0	0	0	0	0	0	0	1	0	0	0	0	0	0	0	0	0	0	0
L	0	0	0	0	0	0	0	0	0	0	1	0	0	0	0	0	0	0	0	0	0
K	0	0	0	0	0	0	0	0	0	0	0	1	0	0	0	0	0	0	0	0	0
M	0	0	0	0	0	0	0	0	0	0	0	0	1	0	0	0	0	0	0	0	0
F	0	0	0	0	0	0	0	0	0	0	0	0	0	1	0	0	0	0	0	0	0
P	0	0	0	0	0	0	0	0	0	0	0	0	0	0	1	0	0	0	0	0	0
S	0	0	0	0	0	0	0	0	0	0	0	0	0	0	0	1	0	0	0	0	0
T	0	0	0	0	0	0	0	0	0	0	0	0	0	0	0	0	1	0	0	0	0
W	0	0	0	0	0	0	0	0	0	0	0	0	0	0	0	0	0	1	0	0	0
Y	0	0	0	0	0	0	0	0	0	0	0	0	0	0	0	0	0	0	1	0	0
V	0	0	0	0	0	0	0	0	0	0	0	0	0	0	0	0	0	0	0	1	0
X	0	0	0	0	0	0	0	0	0	0	0	0	0	0	0	0	0	0	0	0	1
Physicochemical property encoding
AAindex entity	A	R	N	D	C	Q	E	G	H	I	L	K	M	F	P	S	T	W	Y	V
NADH010102	51	-144	-84	-78	137	-128	-115	-13	-55	106	103	-205	73	108	-79	-26	-3	69	11	108
BROC820102	3.9	3.2	-2.8	-2.8	-14.3	1.8	-7.5	-2.3	2	11	15	-2.5	4.1	14.7	5.6	-3.5	1.1	17.8	3.8	2.1
MEIH800102	0.94	1.09	1.04	1.08	0.84	1.11	1.12	1.01	0.92	0.76	0.82	1.23	0.83	0.73	1.04	1.04	1.02	0.87	1.03	0.81
LEVM780101	1.29	0.96	0.9	1.04	1.11	1.27	1.44	0.56	1.22	0.97	1.3	1.23	1.47	1.07	0.52	0.82	0.82	0.99	0.72	0.91
GUYH850104	-0.31	1.3	0.49	0.58	-0.87	0.7	0.68	-0.33	0.13	-0.66	-0.53	1.79	-0.38	-0.45	0.34	0.1	0.21	-0.27	0.4	-0.62
CORJ870101	50.76	48.66	45.8	43.17	58.74	46.09	43.48	50.27	49.33	57.3	53.89	42.92	52.75	53.45	45.39	47.24	49.26	53.59	51.79	56.12
RACS770102	0.941	1.112	1.038	1.071	0.866	1.15	1.1	1.055	0.911	0.742	0.798	1.232	0.781	0.723	1.093	1.082	1.043	0.867	1.05	0.817
GEOR030108	1.092	1.239	0.927	0.919	0.662	1.124	1.199	0.698	1.012	0.912	1.276	1.008	1.171	1.09	0.8	0.886	0.832	0.981	1.075	0.908
HARY940101	90.1	192.8	127.5	117.1	113.2	149.4	140.8	63.8	159.3	164.9	164.6	170	167.7	193.5	123.1	94.2	120	197.1	231.7	139.1
GRAR740102	8.1	10.5	11.6	13	5.5	10.5	12.3	9	10.4	5.2	4.9	11.3	5.7	5.2	8	9.2	8.6	5.4	6.2	5.9
GUYH850105	-0.27	2	0.61	0.5	-0.23	1	0.33	-0.22	0.37	-0.8	-0.44	1.17	-0.31	-0.55	0.36	0.17	0.18	0.05	0.48	-0.65
MEIH800103	87	81	70	71	104	66	72	90	90	105	104	65	100	108	78	83	83	94	83	94
KRIW790102	0.28	0.34	0.31	0.33	0.11	0.39	0.37	0.28	0.23	0.12	0.16	0.59	0.08	0.1	0.46	0.27	0.26	0.15	0.25	0.22
LEVM780106	0.79	0.9	1.25	1.47	0.79	0.92	1.02	1.67	0.81	0.5	0.57	0.99	0.51	0.77	1.78	1.3	0.97	0.79	0.93	0.46
BULH740102	0.691	0.728	0.596	0.558	0.624	0.649	0.632	0.592	0.646	0.809	0.842	0.767	0.709	0.756	0.73	0.594	0.655	0.743	0.743	0.777
FAUJ880101	1.28	2.34	1.6	1.6	1.77	1.56	1.56	0	2.99	4.19	2.59	1.89	2.35	2.94	2.67	1.31	3.03	3.21	2.94	3.67
PUNT030102	-0.15	0.32	0.22	0.41	-0.15	0.03	0.3	0.08	0.06	-0.29	-0.36	0.24	-0.19	-0.22	0.15	0.16	-0.08	-0.28	-0.03	-0.24
HUTJ700103	154.33	341.01	207.9	194.91	219.79	235.51	223.16	127.9	242.54	233.21	232.3	300.46	202.65	204.74	179.93	174.06	205.8	237.01	229.15	207.6
EISD840101	0.25	-1.76	-0.64	-0.72	0.04	-0.69	-0.62	0.16	-0.4	0.73	0.53	-1.1	0.26	0.61	-0.07	-0.26	-0.18	0.37	0.02	0.54
CEDJ970105	8.3	8.7	3.7	4.7	1.6	4.7	6.5	6.3	2.1	3.7	7.4	7.9	2.3	2.7	6.9	8.8	5.1	0.7	2.4	5.3
ZIMJ680102	11.5	14.28	12.82	11.68	13.46	14.45	13.57	3.4	13.69	21.4	21.4	15.71	16.25	19.8	17.43	9.47	15.77	21.67	18.03	21.57
CEDJ970103	8.1	4.6	3.7	3.8	2	3.1	4.6	7	2	6.7	11	4.4	2.8	5.6	4.7	7.3	5.6	1.8	3.3	7.7
CHOC760103	0.38	0.01	0.12	0.15	0.45	0.07	0.18	0.36	0.17	0.6	0.45	0.03	0.4	0.5	0.18	0.22	0.23	0.27	0.15	0.54
CEDJ970102	7.6	5	4.4	5.2	2.2	4.1	6.2	6.9	2.1	5.1	9.4	5.8	2.1	4	5.4	7.2	6.1	1.4	3.2	6.7
ROSM880102	-0.67	3.89	2.27	1.57	-2	2.12	1.78	0	1.09	-3.02	-3.02	2.46	-1.67	-3.24	-1.75	0.1	-0.42	-2.86	0.98	-2.18
BROC820101	7.3	-3.6	-5.7	-2.9	-9.2	-0.3	-7.1	-1.2	-2.1	6.6	20	-3.7	5.6	19.2	5.1	-4.1	0.8	16.3	5.9	3.5
FAUJ830101	0.31	-1.01	-0.6	-0.77	1.54	-0.22	-0.64	0	0.13	1.8	1.7	-0.99	1.23	1.79	0.72	-0.04	0.26	2.25	0.96	1.22
NAKH920101	8.63	6.75	4.18	6.24	1.03	4.76	7.82	6.8	2.7	3.48	8.44	6.25	2.14	2.73	6.28	8.53	4.43	0.8	2.54	5.44
ZHOH040102	1.79	3.2	2.83	2.33	2.22	2.37	2.52	0.7	3.06	4.59	4.72	2.5	3.91	4.84	2.45	1.82	2.45	5.64	4.46	3.67
NAKH900101	7.99	5.86	4.33	5.14	1.81	3.98	6.1	6.91	2.17	5.48	9.16	6.01	2.5	3.83	4.95	6.84	5.77	1.34	3.15	6.65
QIAN880129	-0.43	0.06	0	-0.31	0.19	0.14	-0.41	-0.21	0.21	0.29	-0.1	0.33	-0.01	0.25	0.28	-0.23	-0.26	0.15	0.09	-0.1
